# Supplementary material
Source: PubMed Central journal article supplement (PMC4408613)
Supplement: NIHMS678975-supplement-Supplementary_Methods.pdf [file NIHMS678975-supplement-Supplementary_Methods.pdf]

## SUPPLEMENTARY METHODS

**Estimation of total number of clones from single cell data.** This supplement derives the expression provided in the main text (methods) for the probability,  $P(Mb,c)$ , of the peripheral blood (PB) being supported by  $N$  clones, given that we observed  $b$  distinct clonal barcodes among  $c$  cells randomly sampled. The general strategy is to first calculate the probability  $P(b|N,c)$  of observing  $b$  barcodes assuming  $N$  clonal barcodes in total, and to then apply Bayes' theorem to obtain  $P(Mb,c)$ .

As noted in the methods section, we assume that clones are of uniform size (each consisting of approximately  $1/N$  of the total number of cells in the PB). This approximation provides a lower limit on estimates of  $N$ . Formally, although the experiment involves sampling cells without replacement, we can make the approximation that sampling occurs with replacement since only  $\sim 100$  cells are sampled out of  $10^5$ - $10^6$  PB cells in each mouse. Enumerating the  $N$  clonal barcodes as  $1,2,\dots,N$ , the probability of sampling  $x_1$  cells with barcode 1,  $x_2$  cells with barcode 2, etc, is a multinomial,  $P(x_1, \dots, x_N | N, c) = \frac{c!}{x_1! \dots x_N!} N^{-c}$ .

Since the aim of the analysis to relate the number of barcodes  $b$  observed in a given experiment to the total number of barcodes  $N$ , the precise identity of

clonal barcodes  $(1, \dots, N)$  is not of interest. We therefore group together all permutations of  $\{x_1, \dots, x_N\}$ . These permutations all have the same probability  $P(x_1, \dots, x_N | N, c)$ , so if  $N_p$  is the number of permutations, then the probability of realizing the group in an experiment is  $P(x_1, \dots, x_N | N, c)N_p$ .

To obtain an expression for  $P(b|N, c)$ , it is useful to note that each permutation group  $\{x_1, \dots, x_N\}$  can be characterized by a distinct pattern of clonal counts  $\{n_0, \dots, n_c\}$ , where  $n_0$  is the number of clonal barcodes that are found in the mouse but do not appear among the  $c$  cells of the experiment;  $n_1$  clones appear in just one cell,  $n_2$  clones appear in two cells, etc. The clonal counts satisfy two constraints  $\sum_{k=0}^c n_k = N$  and  $\sum_{k=0}^c k \cdot n_k = c$ , so we only need to consider  $\{n_2, \dots, n_c\}$ , since  $n_1 = c - \sum_{k=2}^c k \cdot n_k$  and  $n_0 = N - \sum_{k=1}^c n_k$ . With this notation, number of observed barcodes is  $b = N - n_0 = \sum_{k=1}^c n_k$ , and the number of permutations of  $\{x_1, \dots, x_N\}$  is  $N_p = \frac{N!}{n_0! \dots n_c!}$ . The desired probability is thus,

$$P(n_1, \dots, n_c | N, c) = \frac{c!}{\prod_{k=1}^c (k!)^{n_k}} N^{-c} \times \frac{N!}{(N - \sum_{k=1}^c n_k)! n_1! \dots n_c!}.$$

The first term in this expression is  $P(x_1, \dots, x_N | N, c)$  for all permutations  $(x_1, \dots, x_N)$  with clonal counts  $\{n_1, \dots, n_c\}$ ; the second term is  $N_p$ . As noted above,  $n_1$  is not independent of  $\{n_2, \dots, n_c\}$ , but is included for clarity. For example, the probability of each of the  $c$  sampled cells arising from a distinct clone is,

$$P(n_1 = c, n_2 = 0, \dots, n_c = 0 | N, c) = \frac{N!}{(N-c)!} N^{-c}.$$

This particular case is well known as the “birthday problem”, which asks about the probability that  $c$  people in a room will have different birthdays (with  $N$  days per year).

With this result we are now set to apply Bayes’ theorem to obtain the probability  $P(N|c; n_1, \dots, n_c)$  for the number of clones  $N$ , given data on the clone counts  $\{n_1, \dots, n_c\}$  from  $c$  cells. We use a uniform prior for  $N$ . We find,

$$P(N|c; n_1, \dots, n_c) = \frac{P(n_1, \dots, n_c|N, c)}{\sum_{M=0}^{\infty} P(n_1, \dots, n_c|M, c)} = \frac{1}{Z} N^{-c} \frac{N!}{(N-b)!},$$

where  $Z = \sum_{k=1}^{\infty} \frac{k!}{(k-b)!k^c}$ , and  $b = \sum_{k=1}^c n_k$  is the number of unique barcodes observed in the sample. Noting that  $P(N|c; n_1, \dots, n_c)$  depends only on  $b$  and not on the individual values of  $(n_1, \dots, n_c)$ , we obtain the main result given in the methods section,  $P(N|b, c) = \frac{1}{Z} \frac{N!}{(N-b)!N^c}$ .
