# Supplementary material
Source: PubMed Central journal article supplement (PMC4408613)
Supplement: NIHMS678975-supplement-Supplementary_Table_1.pdf [file NIHMS678975-supplement-Supplementary_Table_1.pdf]

**Supplementary Table 1 | Summary of longitudinal analyses**

| Mouse ID | Dox Conc. (g/L) | Dox Duration (Weeks) | PB analysis (weeks off Dox) |       |       |       | Cell number of BM populations |               |        |        |       |        |         |         |           |      |  |   |
|----------|-----------------|----------------------|-----------------------------|-------|-------|-------|-------------------------------|---------------|--------|--------|-------|--------|---------|---------|-----------|------|--|---|
|          |                 |                      | PB-Gr                       | PB-B  | PB-T  | WB-Gr | BM source                     | Chase (weeks) | LT-HSC | ST-HSC | MPP   | MyP    | Gr      | Mono    | Pro/pre B | Note |  |   |
| AR384    | 2               | 3                    | 14-42                       | 14-42 | 14-42 |       |                               |               |        |        |       |        |         |         |           |      |  |   |
| AR1123   | 1               | 4                    | 18-49                       | 18-49 | 18-49 |       |                               |               |        |        |       |        |         |         |           |      |  |   |
| LL91     | 1               | 1 day                | 17-42                       |       |       |       |                               |               |        |        |       |        |         |         |           |      |  |   |
| LL145    | 1               | 1 day                | 17-42                       |       |       |       |                               |               |        |        |       |        |         |         |           |      |  |   |
| AR1120   | 1               | 4                    | 19-36                       |       |       |       |                               |               |        |        |       |        |         |         |           |      |  | 1 |
| AR468    | 2               | 4                    | 46, 55                      |       |       |       |                               |               |        |        |       |        |         |         |           |      |  | 1 |
| JS10     | 1               | 4                    |                             |       |       |       | FTI                           | 9             | n/a    | n/a    | n/a   | n/a    | 2700236 | 69555   | 32089     |      |  |   |
| LL500    | 1               | 1                    |                             |       |       |       | Left Femur                    | 26            | n/a    | n/a    | n/a   | n/a    | 320145  | 10800   | 4948      |      |  |   |
|          |                 |                      |                             |       |       |       | Right Femur                   | 26            | n/a    | n/a    | n/a   | n/a    | 169639  | 5246    | 3379      |      |  |   |
| LL93     | 1               | 4                    |                             |       |       |       | FTI                           | 45            | n/a    | n/a    | n/a   | n/a    | 1110924 | 1105008 | 710483    |      |  |   |
| AR1122   | 1               | 4                    | 12-23                       |       |       |       | Left Femur                    | 26            | 1756   | n/a    | 6011  | 12603  | 718248  | n/a     | 8764      |      |  | 2 |
|          |                 |                      |                             |       |       |       | Right Femur                   | 26            | 1370   | n/a    | 6264  | 15635  | 663014  | n/a     | 10067     |      |  |   |
| LL106    | 1               | 4                    | 13-39                       | 13-39 | 13-39 | 40    | LSRS                          | 40            | 17657  | 10495  | 27790 | 425971 | 8044408 | 653646  | 145273    |      |  |   |
| AR1121   | 1               | 4                    | 12-36                       |       |       | 37    | LSRS                          | 37            | n/a    | n/a    | n/a   | n/a    | 4559390 | n/a     | n/a       |      |  |   |

Note 1 Single cell analysis  
 Note 2 Technical duplicates for PB-Gr samples  
 FTI Femurs, tibias, ilia  
 LSRS Limbs (forelimbs and hindlimbs), spine, ribs, sternum
