# Supplementary material
Source: PubMed Central journal article supplement (PMC4408613)
Supplement: NIHMS678975-supplement-Supplementary_Table_2.pdf [file NIHMS678975-supplement-Supplementary_Table_2.pdf]

**Supplementary Table 2 | Number of PB cells and Tn tags from induced mice**

| Mouse ID | Weeks off Dox | Cell numbers sorted |         |         | Tn tag number |         |         |
|----------|---------------|---------------------|---------|---------|---------------|---------|---------|
|          |               | Granulocytes        | B cells | T cells | Granulocytes  | B cells | T cells |
| LL106    | 13            | 16582               | 56320   | 62266   | 638           | 496     | 1729    |
| LL106    | 18            | 18391               | 193189  | 67590   | 497           | 1840    | 1733    |
| LL106    | 24            | 19068               | 96064   | 75251   | 474           | 1018    | 1546    |
| LL106    | 29            | 15920               | 84012   | 114881  | 679           | 865     | 454     |
| LL106    | 33            | 54979               | 175042  | 184609  | 94            | 664     | 792     |
| LL106    | 39            | 15857               | 123129  | 74931   | 246           | 428     | 1284    |
| AR384    | 14            | 86570               | 373363  | 199931  | 200           | 1148    | 453     |
| AR384    | 19            | 30368               | 270347  | 122096  | 173           | 126     | 75      |
| AR384    | 23            | 36193               | 264606  | 149624  | 441           | 816     | 322     |
| AR384    | 28            | 11504               | 93300   | 51528   | 158           | 510     | 84      |
| AR384    | 37            | 4229                | 96827   | 28756   | 65            | 118     | 229     |
| AR384    | 42            | 24725               | 102827  | 92823   | 191           | 108     | 139     |
| AR1123   | 18            | 20560               | 173263  | 97187   | 905           | 2449    | 2094    |
| AR1123   | 23            | 11976               | 118204  | 76748   | 330           | 2715    | 1554    |
| AR1123   | 28            | 16691               | 118249  | 107416  | 848           | 1354    | 1139    |
| AR1123   | 32            | 14995               | 39181   | 43276   | 582           | 1525    | 889     |
| AR1123   | 36            | 11250               | 53938   | 47324   | 680           | 1363    | 614     |
| AR1123   | 40            | 31550               | 146992  | 68998   | 677           | 1671    | 931     |
| AR1123   | 44            | 15049               | 80083   | 31159   | 292           | 1296    | 1029    |
| AR1123   | 49            | 13379               | 74943   | 83139   | 68            | 364     | 336     |
| LL91     | 17            | 2764                | 32089   | 25913   | 94            | n/a     | n/a     |
| LL91     | 21            | 1389                | 6531    | 6781    | 37            | n/a     | n/a     |
| LL91     | 27            | 3172                | 171087  | 56838   | 60            | n/a     | n/a     |
| LL91     | 32            | 4953                | 39034   | 105984  | 94            | n/a     | n/a     |
| LL91     | 36            | 6178                | 15004   | 9621    | 40            | n/a     | n/a     |
| LL91     | 42            | 6658                | 29743   | 17528   | 54            | n/a     | n/a     |
| LI145    | 17            | 4189                | 12638   | 19747   | 48            | n/a     | n/a     |
| LI145    | 21            | 3875                | 4013    | 12136   | 48            | n/a     | n/a     |
| LI145    | 27            | 6218                | 163965  | 122637  | 70            | n/a     | n/a     |
| LI145    | 32            | 2383                | 5718    | 110768  | 46            | n/a     | n/a     |
| LI145    | 36            | 3748                | 4349    | 13893   | 54            | n/a     | n/a     |
| LI145    | 42            | 7682                | 9923    | 19763   | 16            | n/a     | n/a     |
| AR1121   | 12            | 14689               | 224252  | 108819  | 117           | n/a     | n/a     |
| AR1121   | 18            | 25864               | 363435  | 133618  | 199           | n/a     | n/a     |
| AR1121   | 23            | 18636               | 105812  | 54703   | 184           | n/a     | n/a     |
| AR1121   | 28            | 27923               | 144099  | 83665   | 140           | n/a     | n/a     |
| AR1121   | 32            | 21703               | 138326  | 53967   | 58            | n/a     | n/a     |
| AR1121   | 36            | 12084               | 80804   | 104579  | 47            | n/a     | n/a     |
