# Supplementary material
Source: PubMed Central journal article supplement (PMC4408613)
Supplement: NIHMS678975-supplement-Supplementary_Table_3.pdf [file NIHMS678975-supplement-Supplementary_Table_3.pdf]

**Supplementary Table 3 | Number of Tn tags detected in BM cell populations**

| Mouse ID    | Dox induction | Chase period at analysis | LTHSC | STHSC | MPP | MyP | Gr   | Mo  | B   |
|-------------|---------------|--------------------------|-------|-------|-----|-----|------|-----|-----|
| JS10        | 1 month       | 8 weeks                  | N     | N     | N   | N   | 1597 | 572 | 482 |
| AR1122 (LF) | 1 month       | 26 weeks                 | 105   | N     | 40  | 186 | 515  | N   | 356 |
| AR1122 (RF) | 1 month       | 26 weeks                 | 106   | N     | 134 | 280 | 329  | N   | 279 |
| LL500 (LF)  | 1 week        | 26 weeks                 | N     | N     | N   | N   | 181  | 48  | 74  |
| LL500 (RF)  | 1 week        | 26 weeks                 | N     | N     | N   | N   | 225  | 109 | 79  |
| LL106       | 1 month       | 40 weeks                 | 502   | 1073  | 607 | 814 | 2153 | 934 | 241 |
| LL93        | 1 month       | 45 weeks                 | N     | N     | N   | N   | 457  | 390 | 90  |

MyP: myeloid progenitor; Gr: granulocytes; Mo: monocytes; B: pro/pre B cells; N: population not analyzed
