# Supplementary material
Source: PubMed Central journal article supplement (PMC4408613)
Supplement: NIHMS678975-supplement-Supplementary_Table_4.pdf [file NIHMS678975-supplement-Supplementary_Table_4.pdf]

**Supplementary Table 4 | Summary of transplantation experiments**

| Recipient Mouse ID | Donor population                                                      | Competitor                                                       | PB analysis (weeks post transplant) |       |       | BM analysis |                       |
|--------------------|-----------------------------------------------------------------------|------------------------------------------------------------------|-------------------------------------|-------|-------|-------------|-----------------------|
|                    |                                                                       |                                                                  | PB-Gr                               | PB-B  | PB-T  | BM source   | Time after transplant |
| AR1001             | retrovirus-infected DsRed <sup>+</sup> LSK, 2000 cells/mouse          | 100K WT BM cells                                                 | 10-20                               | 10-20 | 10-20 |             |                       |
| AR856              | DsRed <sup>+</sup> LTHSC 4000 cells/mouse                             | Lin <sup>-</sup> cKit <sup>+</sup> Sca1 <sup>-</sup> WT BM cells | 6-16                                | 6-16  | 6-16  |             |                       |
| AR541              | DsRed <sup>+</sup> Lin <sup>-</sup> cKit <sup>+</sup> 44K cells/mouse | none                                                             | 19-32                               | 19-32 | 19-32 |             |                       |
| LL109              | DsRed <sup>+</sup> BM from Left Femur, 250K/mouse                     | none                                                             | 5-14                                | 5-14  | 5-14  | FTI         | 73 weeks              |
| LL113              | DsRed <sup>+</sup> BM from Left Tibia, 380K/mouse                     | none                                                             | 5-14                                | 5-14  | 5-14  | FTI         | 73 weeks              |
