# Supplementary material
Source: PubMed Central journal article supplement (PMC4408613)
Supplement: NIHMS678975-supplement-Supplementary_Table_5.pdf [file NIHMS678975-supplement-Supplementary_Table_5.pdf]

**Supplementary Table 5 | Number of cells and Tn tag in PB of transplant recipients**

| Mouse ID | Weeks after Transplantation | Cell numbers sorted |         |         | Tn tag number |         |         |
|----------|-----------------------------|---------------------|---------|---------|---------------|---------|---------|
|          |                             | Granulocytes        | B cells | T cells | Granulocytes  | B cells | T cells |
| AR1001   | 10                          | 6249                | 172778  | 26599   | 4             | 3       | 5       |
| AR1001   | 15                          | 19107               | 154762  | 49297   | 7             | 13      | 20      |
| AR1001   | 20                          | 38043               | 184453  | 84779   | 6             | 1       | 3       |
| AR856    | 6                           | 84017               | 462811  | 23660   | 57            | 29      | 43      |
| AR856    | 11                          | 64224               | 581036  | 82387   | 30            | 41      | 19      |
| AR856    | 16                          | 62200               | 572920  | 109451  | 29            | 42      | 13      |
| AR541    | 19                          | 41045               | 442261  | 69373   | 96            | 622     | 107     |
| AR541    | 23                          | 23206               | 423020  | 87473   | 174           | 600     | 422     |
| AR541    | 27                          | 27777               | 592059  | 141830  | 145           | 430     | 147     |
| AR541    | 32                          | 19801               | 532027  | 131064  | 93            | 552     | 513     |
| LL109    | 5                           | 25122               | 274152  | n/a     | 32            | 29      | n/a     |
| LL109    | 9                           | 76195               | 120671  | n/a     | 8             | 6       | n/a     |
| LL109    | 14                          | 68317               | 406874  | n/a     | 19            | 15      | n/a     |
| LL113    | 5                           | 63836               | 266566  | n/a     | 40            | 21      | n/a     |
| LL113    | 9                           | 103350              | 108182  | n/a     | 39            | 15      | n/a     |
| LL113    | 14                          | 151594              | 508981  | n/a     | 62            | 36      | n/a     |
