# Supplementary material
Source: PubMed Central journal article supplement (PMC4408613)
Supplement: NIHMS678975-supplement-Supplementary_Table_6.pdf [file NIHMS678975-supplement-Supplementary_Table_6.pdf]

**Supplementary Table 6 | Antibodies used in FACS experiments**

| <b>Fluorochrome</b> | <b>Species</b> | <b>Cell surface marker</b> | <b>Catalogue number</b> | <b>Vendor</b>          |
|---------------------|----------------|----------------------------|-------------------------|------------------------|
| FITC                | anti-mouse     | CD4                        | 11-0041-85              | eBioscience            |
| FITC                | anti-mouse     | CD8                        | 11-0081-85              | eBioscience            |
| eFluor-450          | anti-mouse     | CD19                       | 48-0193-82              | eBioscience            |
| Alexa fluor 700     | anti-mouse     | Ly6G                       | 561236                  | BD Pharmingen          |
| FITC                | anti-mouse     | Sca1                       | 11-5981-82              | eBioscience            |
| Allophycocyanin     | anti-mouse     | cKit                       | 17-1171-83              | eBioscience            |
| APC-Cy7             | anti-mouse     | CD48                       | 561242                  | BD Pharmingen          |
| PE-Cy5              | anti-mouse     | CD150                      | 115912                  | BioLegend              |
| FITC                | anti-mouse     | Neutrophils (clone 7/4)    | CL8993F                 | Cedarlane Laboratories |
| eFluor-450          | anti-mouse     | IgM                        | 48-5890-82              | eBioscience            |
| Allophycocyanin     | anti-mouse     | B220                       | 17-0452-81              | eBioscience            |
| Biotin              | anti-mouse     | CD127                      | 13-1271-81              | eBioscience            |
| Biotin              | anti-mouse     | B220                       | 13-0452-85              | eBioscience            |
| Biotin              | anti-mouse     | CD19                       | 13-0193-85              | eBioscience            |
| Biotin              | anti-mouse     | Mac1                       | 13-0112-85              | eBioscience            |
| Biotin              | anti-mouse     | CD3e                       | 13-0031-85              | eBioscience            |
| Biotin              | anti-mouse     | Ly-6G                      | 13-5931-85              | eBioscience            |
| Biotin              | anti-mouse     | Ter119                     | 13-5921-85              | eBioscience            |
| eFluor 780          |                | Streptavidin               | 47-4317-82              | eBioscience            |
| eFluor-450          |                | Streptavidin               | 48-4317-82              | eBioscience            |
| Allophycocyanin     | anti-mouse     | CD45.1                     | 17-0453-82              | eBioscience            |
| Biotin              | anti-mouse     | CD45.2                     | 13-0454-85              | eBioscience            |
