# Supplementary material
Source: PubMed Central journal article supplement (PMC4408613)
Supplement: NIHMS678975-supplement-Supplementary_Table_7.pdf [file NIHMS678975-supplement-Supplementary_Table_7.pdf]

**Supplementary Table 7 | Primer sequences**

| Primer name                  | Sequence                                               |
|------------------------------|--------------------------------------------------------|
| Linker sequence (long oligo) | GACCCGGGAGATCTGAATTCAGTGGCACAGCAGTTAGGGGGCTGGTCG       |
| Linker sequence (blunt end)  | /5Phos/CGACCAGCCC/3AmMO/                               |
| Linker sequence (CG end)     | /5Phos/CGCGACCAGCCC/3AmMO/                             |
| Linker sequence (GATC end)   | /5Phos/GATCCGACCAGCCC/3AmMO/                           |
| Tn primer 1                  | /5Biosg/ GGAATTGTGATACAGTGAATTATAAGTG                  |
| Tn primer 2                  | ACACTCTTCCCTACACGACGCTCTCCGATCTNNNCGAGTTTAAATGACTCCAAC |
| Tn primer 3                  | CTTGTCATGCACAAAGTAGATGTCC                              |
| Linker primer 1              | GACCCGGGAGATCTGAATTC                                   |
| Linker primer 2              | GTGACTGGAGTTCAGACGTGTGCTCTCCGATCTAGTGGCACAGCAGTTAGG    |
| Linker primer 3              | AGTGGCACAGCAGTTAGG                                     |

Tn primer 2 and linker primer 2 are used in nest PCR for sequencing library construction; Tn primer 3 and linker primer 3 are used for regular LM-PCR.
